# Supplementary material for: Corylin Inhibits Vascular Cell Inflammation, Proliferation and Migration and Reduces Atherosclerosis in ApoE-Deficient Mice
Source: Antioxidants (Basel). 2020 Mar 25;9(4):275. doi: 10.3390/antiox9040275 (PMC7222202; doi:10.3390/antiox9040275)
Supplement: Supplementary file 1 [file antioxidants-09-00275-s001.pdf]

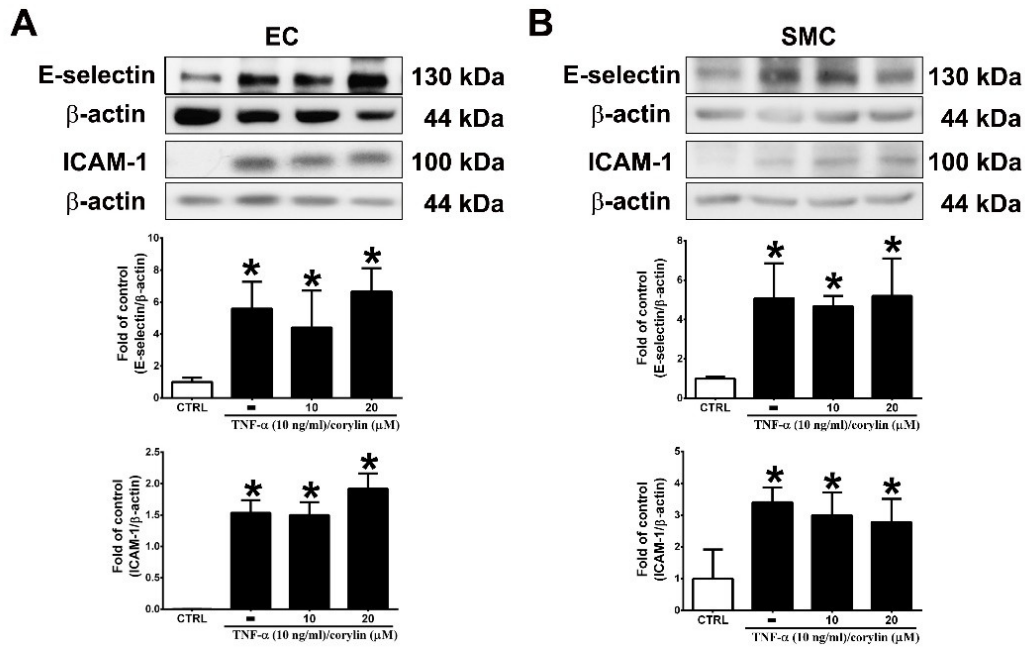

**Figure S1.** Corylin has no effect on ICAM-1 and E-selectin expression in TNF- $\alpha$ -treated HUVECs and VSMCs. HUVECs (A) and serum-starved VSMCs (B) were pretreated (1 h) with corylin (10 or 20  $\mu$ M) and then treated with 10 ng/mL TNF- $\alpha$  for 24 h. ICAM-1 and E-selectin expression were analyzed by western blotting.  $\beta$ -actin was used as an internal control for sample loading. CTRL, control group, VSMCs were cultured without any treatment. The data are provided as the mean  $\pm$  SD. \*  $p < 0.05$ .

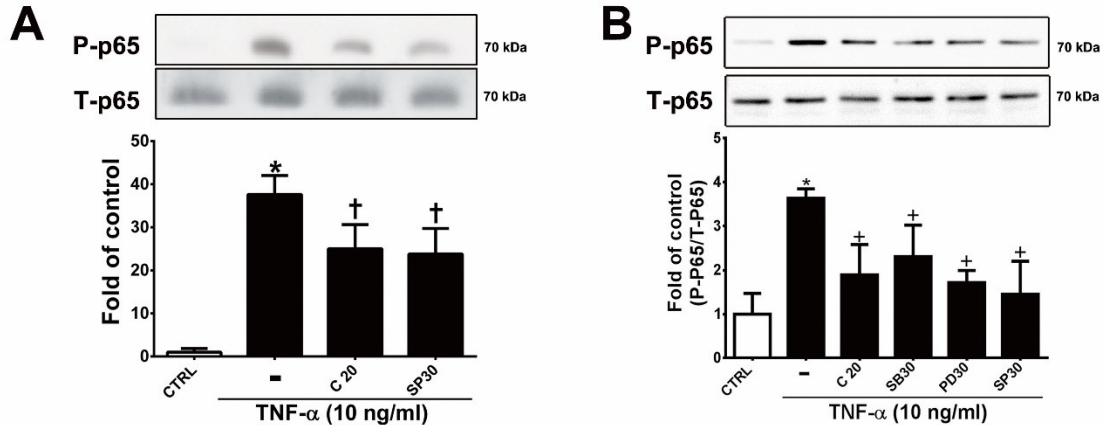

**Figure S2.** Corylin reduces the activation of NF- $\kappa$ B p65 in TNF- $\alpha$ -treated HUVECs and VSMCs. (A,B) HUVECs were pretreated (1 h) with 20  $\mu$ M corylin or 30 nM SP600125 (SP30) and then incubated with 10 ng/mL TNF- $\alpha$  (T) for 15 min. VSMCs were pretreated (1 h) with 20  $\mu$ M corylin, 30  $\mu$ M SB203580 (SB30), 30  $\mu$ M PD98059 (PD30), or 30 nM SP600125 (SP30) and then incubated with 10 ng/mL TNF- $\alpha$  (T) for 15 min. Western blot analysis for phosphorylated NF- $\kappa$ B p65 (P-p65) and quantification of P-p65 to Total NF- $\kappa$ B p65 (T-p65) in VSMCs. The data are provided as the mean  $\pm$  SD. \*  $p < 0.05$  versus the untreated group (CTRL). <sup>†</sup>  $p < 0.05$  versus the TNF- $\alpha$ -treated group.

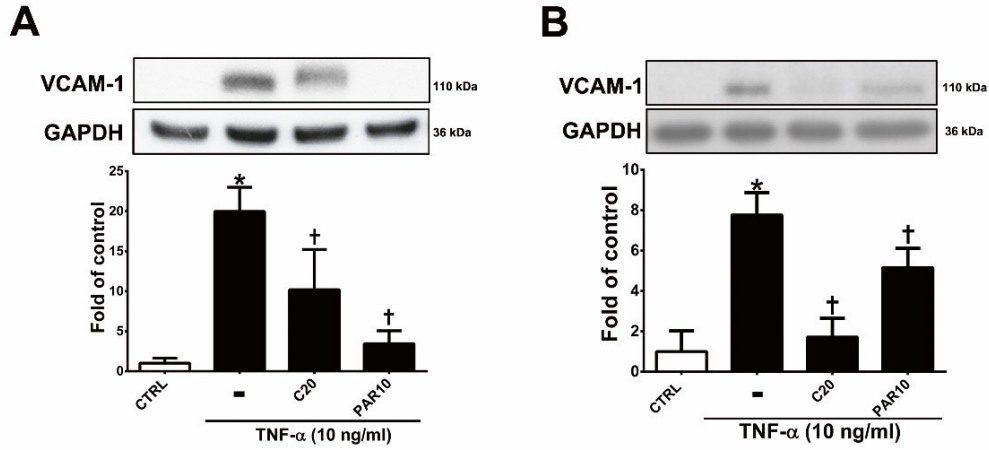

**Figure S3.** Corylin reduces the VCAM-1 expression in TNF- $\alpha$ -treated HUVECs and VSMCs via NF- $\kappa$ B p65 pathway. **(A,B)** HUVECs and VSMCs were pretreated (1 h) with corylin (20  $\mu$ M; C20) or 10  $\mu$ M parthenolide (PAR) and then treated with 10 ng/mL TNF- $\alpha$  for 24 h. Western blot analysis for VCAM-1 and quantification of VCAM-1 to GAPDH in VSMCs. The data are provided as the mean  $\pm$  SD. \*  $p < 0.05$  versus the untreated group (CTRL). <sup>†</sup>  $p < 0.05$  versus the TNF- $\alpha$ -treated group.
